# Supplementary material for: Longitudinal Motor Functional Outcomes and Magnetic Resonance Imaging Patterns of Muscle Involvement in Upper Limbs in Duchenne Muscular Dystrophy
Source: MDPI journal article supplement (doi:10.3390/medicina57111267), 2021-11-18
Supplement: s1 [file s1]

Figure S1. PUL 2.0 Proforma Supplementary File

| Performance of the Upper Limb Module for DMD 2.0 (PUL for DMD)                                                                                                                                                                                                  |                                                                                                                                    |                              |                                                                                                                |                                                                                                               |                                                                          |                                                                                                       |                                                                                                                                             |                                                                                                           |
|-----------------------------------------------------------------------------------------------------------------------------------------------------------------------------------------------------------------------------------------------------------------|------------------------------------------------------------------------------------------------------------------------------------|------------------------------|----------------------------------------------------------------------------------------------------------------|---------------------------------------------------------------------------------------------------------------|--------------------------------------------------------------------------|-------------------------------------------------------------------------------------------------------|---------------------------------------------------------------------------------------------------------------------------------------------|-----------------------------------------------------------------------------------------------------------|
| Name of patient (Initials):                                                                                                                                                                                                                                     |                                                                                                                                    |                              | DOB:                                                                                                           |                                                                                                               |                                                                          | DOA:                                                                                                  |                                                                                                                                             |                                                                                                           |
| Dominant arm (used for all tests): <input type="checkbox"/> Right <input type="checkbox"/> Left                                                                                                                                                                 |                                                                                                                                    |                              |                                                                                                                |                                                                                                               |                                                                          |                                                                                                       |                                                                                                                                             |                                                                                                           |
| Elbow extension ROM full = 0°: Right:                      Left:                                                                                                                                                                                                |                                                                                                                                    |                              |                                                                                                                |                                                                                                               |                                                                          |                                                                                                       |                                                                                                                                             |                                                                                                           |
| e.g. 10° contracture = -10°                                                                                                                                                                                                                                     |                                                                                                                                    |                              |                                                                                                                |                                                                                                               |                                                                          |                                                                                                       |                                                                                                                                             |                                                                                                           |
| Supination ROM: Right: <input type="checkbox"/> Full <input type="checkbox"/> ¾ <input type="checkbox"/> ½ <input type="checkbox"/> ¼      Left: <input type="checkbox"/> Full <input type="checkbox"/> ¾ <input type="checkbox"/> ½ <input type="checkbox"/> ¼ |                                                                                                                                    |                              |                                                                                                                |                                                                                                               |                                                                          |                                                                                                       |                                                                                                                                             |                                                                                                           |
| <input type="checkbox"/> Ambulant <input type="checkbox"/> Non-ambulant                                                                                                                                                                                         |                                                                                                                                    |                              | Steroids: <input type="checkbox"/> Yes <input type="checkbox"/> No                                             |                                                                                                               |                                                                          |                                                                                                       |                                                                                                                                             |                                                                                                           |
| Spinal surgery: <input type="checkbox"/> Yes <input type="checkbox"/> No    Date of surgery:                                                                                                                                                                    |                                                                                                                                    |                              |                                                                                                                |                                                                                                               |                                                                          |                                                                                                       |                                                                                                                                             |                                                                                                           |
| Name of evaluator:                                                                                                                                                                                                                                              |                                                                                                                                    |                              |                                                                                                                | Evaluator signature                                                                                           |                                                                          |                                                                                                       |                                                                                                                                             |                                                                                                           |
| <b>Entry item A. – start with A to identify starting point for subsequent tests. Circle score for each item. DO NOT INCLUDE IN TOTAL SCORE</b>                                                                                                                  |                                                                                                                                    |                              |                                                                                                                |                                                                                                               |                                                                          |                                                                                                       |                                                                                                                                             |                                                                                                           |
| Item                                                                                                                                                                                                                                                            | Description                                                                                                                        | 0                            | 1                                                                                                              | 2                                                                                                             | 3                                                                        | 4                                                                                                     | 5                                                                                                                                           | 6                                                                                                         |
| A.                                                                                                                                                                                                                                                              | Entry item                                                                                                                         | No useful function of hands. | Can use hands to hold pen or pick up a coin or drive a powered chair                                           | Can raise 1 or 2 hands to mouth but cannot raise a cup with a 200g weight in it to mouth                      | Can raise plastic cup with 200g weight in it to mouth using 1 or 2 hands | Can raise both arms (to shoulder height with or without compensation) i.e. elbow bent or in extension | Can raise both arms simultaneously above head only by flexing the elbow (shortening circumference of the movement /using accessory muscles) | Can abduct both arms simultaneously elbows in extension in a full circle until they touch above the head. |
| <b>For item A:</b> A score of 3, 4, 5, 6 on item A, start with item 1 – on this page<br>A score of, 1, 2 start with item 7 on page 2                                                                                                                            |                                                                                                                                    |                              |                                                                                                                |                                                                                                               |                                                                          |                                                                                                       |                                                                                                                                             |                                                                                                           |
| <b>High level shoulder Dimension</b>                                                                                                                                                                                                                            |                                                                                                                                    |                              |                                                                                                                |                                                                                                               |                                                                          |                                                                                                       |                                                                                                                                             |                                                                                                           |
| Item                                                                                                                                                                                                                                                            | Description                                                                                                                        | 0                            | 1                                                                                                              | 2                                                                                                             | Score                                                                    |                                                                                                       |                                                                                                                                             |                                                                                                           |
| 1<br>Score from Entry item above                                                                                                                                                                                                                                | <b>Shoulder abduction both arms above head</b><br>"Raise your arms above your head out to the side – try and keep straight elbows" | Unable                       | Can raise both arms simultaneously <b>above head</b> only by flexing the elbow - with compensation             | Can abduct both arms simultaneously elbows in extension in a full circle until they touch above the head      |                                                                          |                                                                                                       |                                                                                                                                             |                                                                                                           |
| 2                                                                                                                                                                                                                                                               | <b>Raise both arms to shoulder height (elbows at shoulder height)</b><br>"Raise your arms to shoulder level"                       | Unable                       | Can raise both arms to shoulder height either one at a time or with elbows flexed ( <b>with compensation</b> ) | Can raise both elbows to shoulder height <b>without</b> compensation e.g. simultaneously with elbows straight |                                                                          |                                                                                                       |                                                                                                                                             |                                                                                                           |
| 3                                                                                                                                                                                                                                                               | <b>Shoulder flexion to shoulder height (no weights)</b><br>"Reach out and touch my hand" –elbow to eye level                       | Unable                       | Able <b>with</b> compensation                                                                                  | Able <b>without</b> compensation                                                                              |                                                                          |                                                                                                       |                                                                                                                                             |                                                                                                           |
| 4                                                                                                                                                                                                                                                               | <b>Shoulder flexion to shoulder height with 500g weight</b><br>"Reach out and touch my hand" –elbow to eye level                   | Unable                       | Able to lift 500g weight <b>with</b> compensation                                                              | Able to lift 500g weight <b>without</b> compensation                                                          |                                                                          |                                                                                                       |                                                                                                                                             |                                                                                                           |

| High level shoulder Dimension (continued) |                                                                                                |        |                                            |                                               |       |
|-------------------------------------------|------------------------------------------------------------------------------------------------|--------|--------------------------------------------|-----------------------------------------------|-------|
| Item                                      | Description                                                                                    | 0      | 1                                          | 2                                             | Score |
| 5                                         | Shoulder flexion above shoulder height with 500 g weight<br>Hand on lap – "give me the weight" | Unable | Able to lift 500g weight with compensation | Able to lift 500g weight without compensation |       |
| 6                                         | Shoulder flexion above shoulder with 1 kg weight<br>Hand on lap – "give me the weight"         | Unable | Able to lift 1 kg weight with compensation | Able to lift 1 kg weight without compensation |       |

| Mid level elbow Dimension         |                                                                                                                              |        |                                                                                                                              |                                                                                          |       |
|-----------------------------------|------------------------------------------------------------------------------------------------------------------------------|--------|------------------------------------------------------------------------------------------------------------------------------|------------------------------------------------------------------------------------------|-------|
| Do these tests on all individuals |                                                                                                                              |        |                                                                                                                              |                                                                                          |       |
| Item                              | Description                                                                                                                  | 0      | 1                                                                                                                            | 2                                                                                        | Score |
| 7                                 | Hand(s) to mouth<br>"Bring the cup to your mouth with one hand"                                                              | Unable | Able to bring 200g in cup with any compensation to mouth (can use more than one hand and / or bring head to hands)           | Able to bring 200g in cup to mouth with one hand no elbow support (without compensation) |       |
| 8                                 | Hands to table from lap<br>"Bring both hands from lap to table"                                                              | Unable | Able to bring two hands completely (to wrist crease) to table but <b>NOT simultaneously or in one action</b>                 | Two hands completely on table simultaneously                                             |       |
| 9                                 | Move weight on table 100g<br>"Move the weight from outside circle to centre circle"                                          | Unable | Can move 100g weight from outer to centre circle using compensation<br><br>(slide forearm or elbow make contact with table)  | Can lift 100g weight from outer to centre circle without compensation                    |       |
| 10                                | Move weight on table 500g<br>"Move the weight from outside circle to centre circle"                                          | Unable | Can move 500g weight from outer to centre circle using compensation<br><br>(slide forearm or elbow make contact with table)  | Can lift 500g weight from outer to centre circle without compensation                    |       |
| 11                                | Move weight on table 1kg<br>"Move the weight from outside circle to centre circle"                                           | Unable | Can move 1kg weight from outer to centre circle using compensation<br><br>(slide forearm or elbow make contact with table)   | Can lift 1kg weight from outer to centre circle without compensation                     |       |
| 12                                | Lift heavy can diagonally<br>"Lift can from this circle nearest your hand to this circle furthest away and across your body" | Unable | Can move heavy can from nearest circle across body with compensation<br><br>(slide forearm or elbow make contact with table) | Can lift heavy can from nearest circle across body without compensation                  |       |

### Mid level elbow Dimension (continued)

| Item | Description                                                                                                     | 0                                                | 1                                         | 2                                            | Score |
|------|-----------------------------------------------------------------------------------------------------------------|--------------------------------------------------|-------------------------------------------|----------------------------------------------|-------|
| 13   | <b>Stack of three cans</b><br>"Stack these two cans, one at a time on the middle can using one hand"            | Unable to stack third can even with compensation | Able to stack third can with compensation | Able to stack third can without compensation |       |
| 14   | <b>Stack of five cans</b><br>"Stack these two additional cans, one at a time on top of this can using one hand" | Unable to stack fifth can even with compensation | Able to stack fifth can with compensation | Able to stack fifth can without compensation |       |
| 15   | <b>Remove lid from container</b><br>"Use your hands to open this container"                                     | Unable                                           | Opens completely                          |                                              |       |

### Distal wrist and hand Dimension

Do these tests on all individuals

|    |                                                                                                                                | 0                                                  | 1                                                                                                | 2                                                                                              | Score |
|----|--------------------------------------------------------------------------------------------------------------------------------|----------------------------------------------------|--------------------------------------------------------------------------------------------------|------------------------------------------------------------------------------------------------|-------|
| 16 | <b>Tearing paper</b><br>"Tear the sheet of paper beginning from here"                                                          | Unable                                             | Tears the sheet of paper folded in half from the folded edge                                     | Tears the sheet of paper folded in 4, beginning from the folded edge                           |       |
| 17 | <b>Tracing path</b><br>"Use your pencil to complete the path in one smooth movement"                                           | Unable                                             | Completes the path with compensation - needs to raise pencil from paper or pivot arm             | Able to complete the path <b>without stops</b> or raising hand from paper                      |       |
| 18 | <b>Push on light</b><br>"Push on the light with the fingers of one hand"                                                       | Unable                                             | Able to turn the light on momentarily with fingers of one hand                                   | Able to turn the light on permanently with fingers of one hand                                 |       |
| 19 | <b>Supination</b><br>"Pick up the light and turn your hand over"                                                               | Unable                                             | Picks up the light but either turns hands over incompletely or uses compensation to turn it over | Picks up the light, and turns the hand over completely with no compensatory movements          |       |
| 20 | <b>Picking up coins</b><br>"Using one hand, Pick up 6 coins, one at a time"                                                    | Cannot pick up one coin                            | Can pick up <b>one</b> coin/ token                                                               | Can pick up six coins in one hand                                                              |       |
| 21 | <b>Placing finger on number diagram</b><br>(precision not essential)<br>"Using one finger to touch each number on the diagram" | Cannot raise the finger or slide it on the diagram | Able to place finger (slide or lift) between at least two squares                                | Able to place finger successively on the numbers of the diagram (with or without compensation) |       |
| 22 | <b>Pick up 10g weight finger pinch</b><br>"Pick up this small weight like this (by body of weight)"                            | Unable                                             | Able to grip and lift weight off surface                                                         |                                                                                                |       |

**Additional Material**  
**Item 17: Tracing a path**

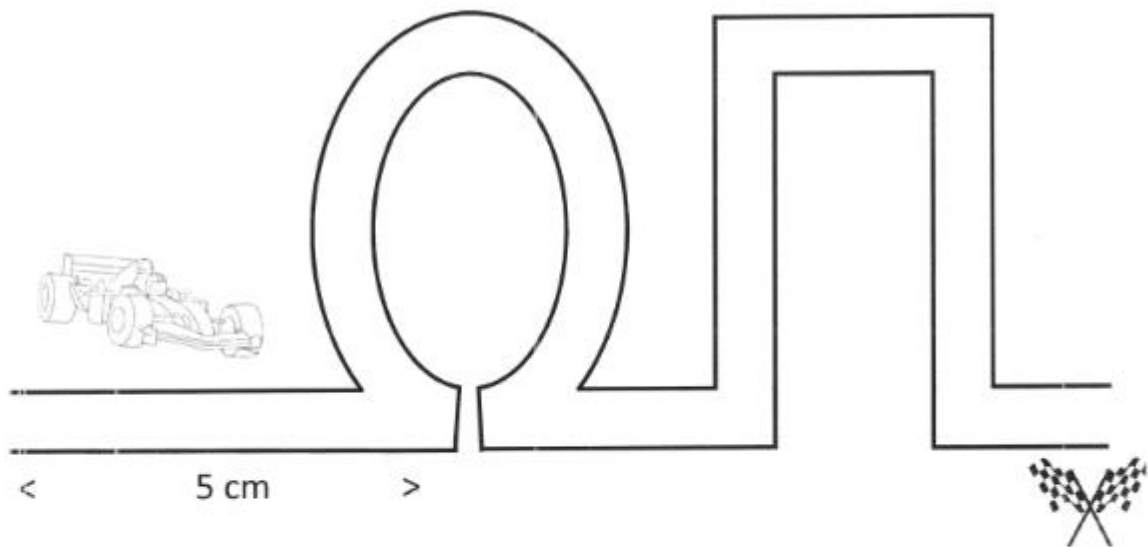

**Item 21: Placing finger on number diagram**

Instruction: Starting on the yellow number 1 point to the numbers 1 to 10 in turn following the arrow

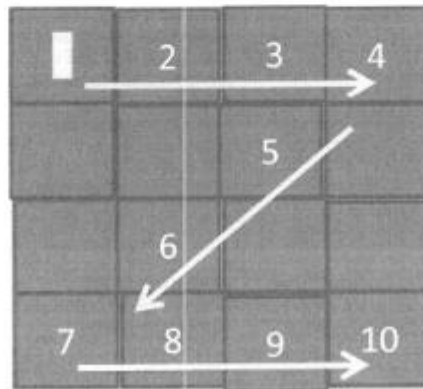

**Figure S2.** MRI and PUL scores at shoulder, arm and forearm level at baseline and at follow up

| N  | A/NA | AGE   | SHOULDER MRI score at FOLLOW UP |         |         |         |           |           |       |      |             |     | ARM MRI score at FOLLOW UP |      |     | FOREARM MRI score at FOLLOW UP |      |      |      |     |     |     |     |     |     |    |     |      |     | PUL TOTAL SCORE |          |           | MRI TOTAL SCORE |          |          |
|----|------|-------|---------------------------------|---------|---------|---------|-----------|-----------|-------|------|-------------|-----|----------------------------|------|-----|--------------------------------|------|------|------|-----|-----|-----|-----|-----|-----|----|-----|------|-----|-----------------|----------|-----------|-----------------|----------|----------|
|    |      |       | del                             | suprasp | infrasp | subscap | pec minor | pec major | corac | serr | teres minor | lat | bic                        | brac | tri | sup                            | pron | F cr | Palm | Fds | Fcu | Fdp | Anc | Ecu | Edm | Ed | Ecr | Br R | Fpl | Epl             | BASELINE | FOLLOW UP | PUL changes     | BASELINE | FOLLOWUP |
| 1  | A    | 5     |                                 |         |         |         |           |           |       |      |             |     |                            |      |     |                                |      |      |      |     |     |     |     |     |     |    |     |      |     | 39              | 39       | 0         | 14.5            | 14.5     | 0        |
| 2  | A    | 6     |                                 |         |         |         |           |           |       |      |             |     |                            |      |     |                                |      |      |      |     |     |     |     |     |     |    |     |      |     | 41              | 42       | 1         | 12              | 12.5     | 0.5      |
| 3  | A    | 8     |                                 |         |         |         |           |           |       |      |             |     |                            |      |     |                                |      |      |      |     |     |     |     |     |     |    |     |      |     | 42              | 42       | 0         | 13              | 15       | 2        |
| 4  | A    | 9     |                                 |         |         |         |           |           |       |      |             |     |                            |      |     |                                |      |      |      |     |     |     |     |     |     |    |     |      |     | 40              | 36       | -4        | 15              | 23       | 8        |
| 5  | A    | 10    |                                 |         |         |         |           |           |       |      |             |     |                            |      |     |                                |      |      |      |     |     |     |     |     |     |    |     |      |     | 42              | 42       | 0         | 15.5            | 18       | 2.5      |
| 6  | A    | 10    |                                 |         |         |         |           |           |       |      |             |     |                            |      |     |                                |      |      |      |     |     |     |     |     |     |    |     |      |     | 42              | 39       | -3        | 53.5            | 56       | 2.5      |
| 7  | A    | 10    |                                 |         |         |         |           |           |       |      |             |     |                            |      |     |                                |      |      |      |     |     |     |     |     |     |    |     |      |     | 40              | 37       | -3        | 20.5            | 29       | 8.5      |
| 8  | EA   | 10.7  |                                 |         |         |         |           |           |       |      |             |     |                            |      |     |                                |      |      |      |     |     |     |     |     |     |    |     |      |     | 36              | 31       | -5        | 49.5            | 52       | 2.5      |
| 9  | EA   | 11    |                                 |         |         |         |           |           |       |      |             |     |                            |      |     |                                |      |      |      |     |     |     |     |     |     |    |     |      |     | 42              | 41       | -1        | 36.5            | 38.5     | 2        |
| 10 | A    | 11    |                                 |         |         |         |           |           |       |      |             |     |                            |      |     |                                |      |      |      |     |     |     |     |     |     |    |     |      |     | 41              | 41       | 0         | 25              | 25       | 0        |
| 11 | ENA  | 11.11 |                                 |         |         |         |           |           |       |      |             |     |                            |      |     |                                |      |      |      |     |     |     |     |     |     |    |     |      |     | 27              | 26       | -1        | 59.5            | 73.5     | 14       |
| 12 | ENA  | 11.7  |                                 |         |         |         |           |           |       |      |             |     |                            |      |     |                                |      |      |      |     |     |     |     |     |     |    |     |      |     | 37              | 28       | -9        | 39              | 51       | 12       |
| 13 | A    | 12    |                                 |         |         |         |           |           |       |      |             |     |                            |      |     |                                |      |      |      |     |     |     |     |     |     |    |     |      |     | 42              | 42       | 0         | 17.5            | 18       | 0.5      |
| 14 | ENA  | 12.5  |                                 |         |         |         |           |           |       |      |             |     |                            |      |     |                                |      |      |      |     |     |     |     |     |     |    |     |      |     | 41              | 41       | 0         | 22.5            | 31.5     | 9        |
| 15 | ENA  | 12.5  |                                 |         |         |         |           |           |       |      |             |     |                            |      |     |                                |      |      |      |     |     |     |     |     |     |    |     |      |     | 29              | 25       | -4        | 29              | 29       | 0        |
| 16 | ENA  | 13    |                                 |         |         |         |           |           |       |      |             |     |                            |      |     |                                |      |      |      |     |     |     |     |     |     |    |     |      |     | 35              | 31       | -4        | 48              | 55.5     | 7.5      |
| 17 | LNA  | 14.1  |                                 |         |         |         |           |           |       |      |             |     |                            |      |     |                                |      |      |      |     |     |     |     |     |     |    |     |      |     | 36              | 31       | -5        | 37.5            | 38.5     | 1        |
| 18 | A    | 16    |                                 |         |         |         |           |           |       |      |             |     |                            |      |     |                                |      |      |      |     |     |     |     |     |     |    |     |      |     | 41              | 41       | 0         | 18              | 18       | 0        |
| 19 | LNA  | 16    |                                 |         |         |         |           |           |       |      |             |     |                            |      |     |                                |      |      |      |     |     |     |     |     |     |    |     |      |     | 17              | 14       | -3        | 87.5            | 87.5     | 0        |
| 20 | ENA  | 17    |                                 |         |         |         |           |           |       |      |             |     |                            |      |     |                                |      |      |      |     |     |     |     |     |     |    |     |      |     | 36              | 33       | -3        | 56              | 57       | 1        |
| 21 | LNA  | 18    |                                 |         |         |         |           |           |       |      |             |     |                            |      |     |                                |      |      |      |     |     |     |     |     |     |    |     |      |     | 37              | 31       | -6        | 64              | 64.5     | 0.5      |
| 22 | LNA  | 18    |                                 |         |         |         |           |           |       |      |             |     |                            |      |     |                                |      |      |      |     |     |     |     |     |     |    |     |      |     | 8               | 6        | -2        | 110             | 110      | 0        |
| 23 | LNA  | 20    |                                 |         |         |         |           |           |       |      |             |     |                            |      |     |                                |      |      |      |     |     |     |     |     |     |    |     |      |     | 24              | 26       | 2         | 74.5            | 80.5     | 6        |
| 24 | LNA  | 20    |                                 |         |         |         |           |           |       |      |             |     |                            |      |     |                                |      |      |      |     |     |     |     |     |     |    |     |      |     | 25              | 22       | -3        | 44              | 52       | 8        |
| 25 | LNA  | 20    |                                 |         |         |         |           |           |       |      |             |     |                            |      |     |                                |      |      |      |     |     |     |     |     |     |    |     |      |     | 15              | 13       | -2        | 99              | 100      | 1        |
| 26 | LNA  | 22.5  |                                 |         |         |         |           |           |       |      |             |     |                            |      |     |                                |      |      |      |     |     |     |     |     |     |    |     |      |     | 13              | 12       | -1        | 87.5            | 95.5     | 8        |
| 27 | LNA  | 30    |                                 |         |         |         |           |           |       |      |             |     |                            |      |     |                                |      |      |      |     |     |     |     |     |     |    |     |      |     | 16              | 14       | -2        | 93              | 100.5    | 7.5      |
